# Supplementary material
Source: MDPI journal article supplement (https://www.mdpi.com/1999-4907/14/9/1751)
Supplement: s1 [file s1]

Archive with 4 entries (4 files):
- supplementary figures0825.pdf
- Table S1.xlsx
- Table S2.xlsx
- Table S3.xlsx
