# Supplementary material
Source: MDPI journal article supplement (https://www.mdpi.com/1999-4907/14/9/1751)
Supplement: s1 [file s1 › supplementary figures0825.pdf]

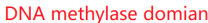

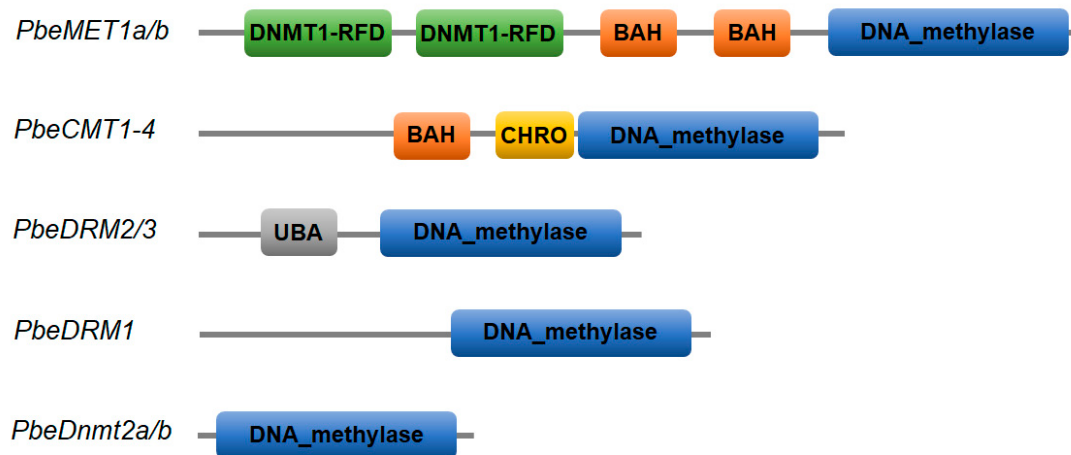

**Figure S2.** Various domains present in PbeMTase proteins.

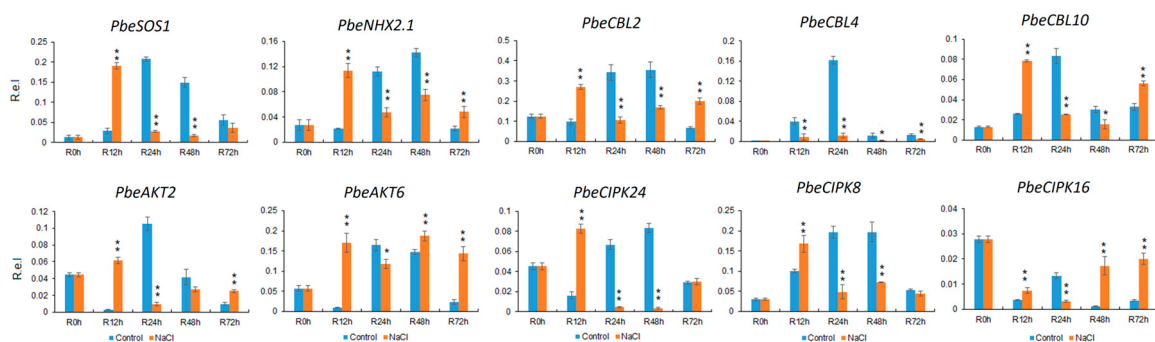

**Figure S3.** Expression patterns of salt-responsive genes under salt stress in *Pyrus betulaefolia*. Young *P. betulaefolia* plants at the eight leaves stage were subjected to 200 mM NaCl stress by watering them with a salt solution. At 0, 12, 24, 48 and 72 h, samples of roots were collected. RT-qPCR analysis was performed to determine the relative expression levels. The  $2^{-\Delta\Delta CT}$  method was used to calculate the relative expression. Significance levels of 0.05 and 0.01 were denoted by an asterisk and double asterisks, respectively. R.e.l. represented the relative expression level.

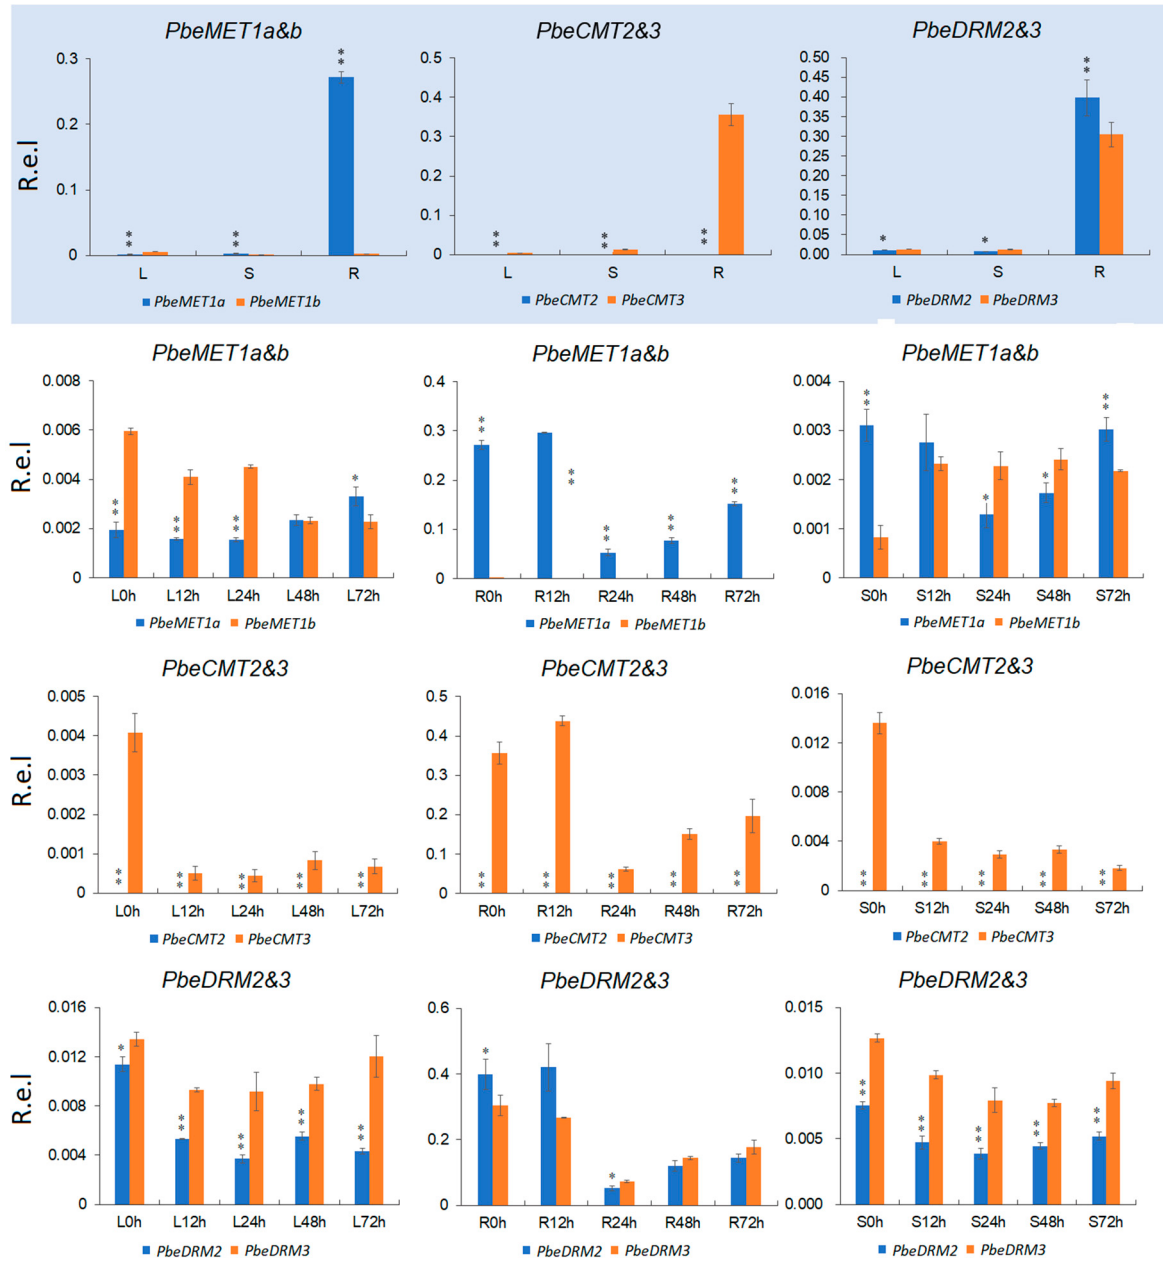

**Figure S4.** Expression profiles of the *MTase* syntenic gene pairs in response to salt stress treatment. Roots were sampled from *P. betulaefolia* plants growing under normal conditions. At 0, 12, 24, 48 and 72 h, samples were collected. RT-qPCR analysis was performed to determine the relative expression levels. The  $2^{-\Delta\Delta CT}$  method was used to calculate the relative expression. Significance levels of 0.05 and 0.01 were denoted by an asterisk and double asterisks, respectively. R.e.l. represented the relative expression level.

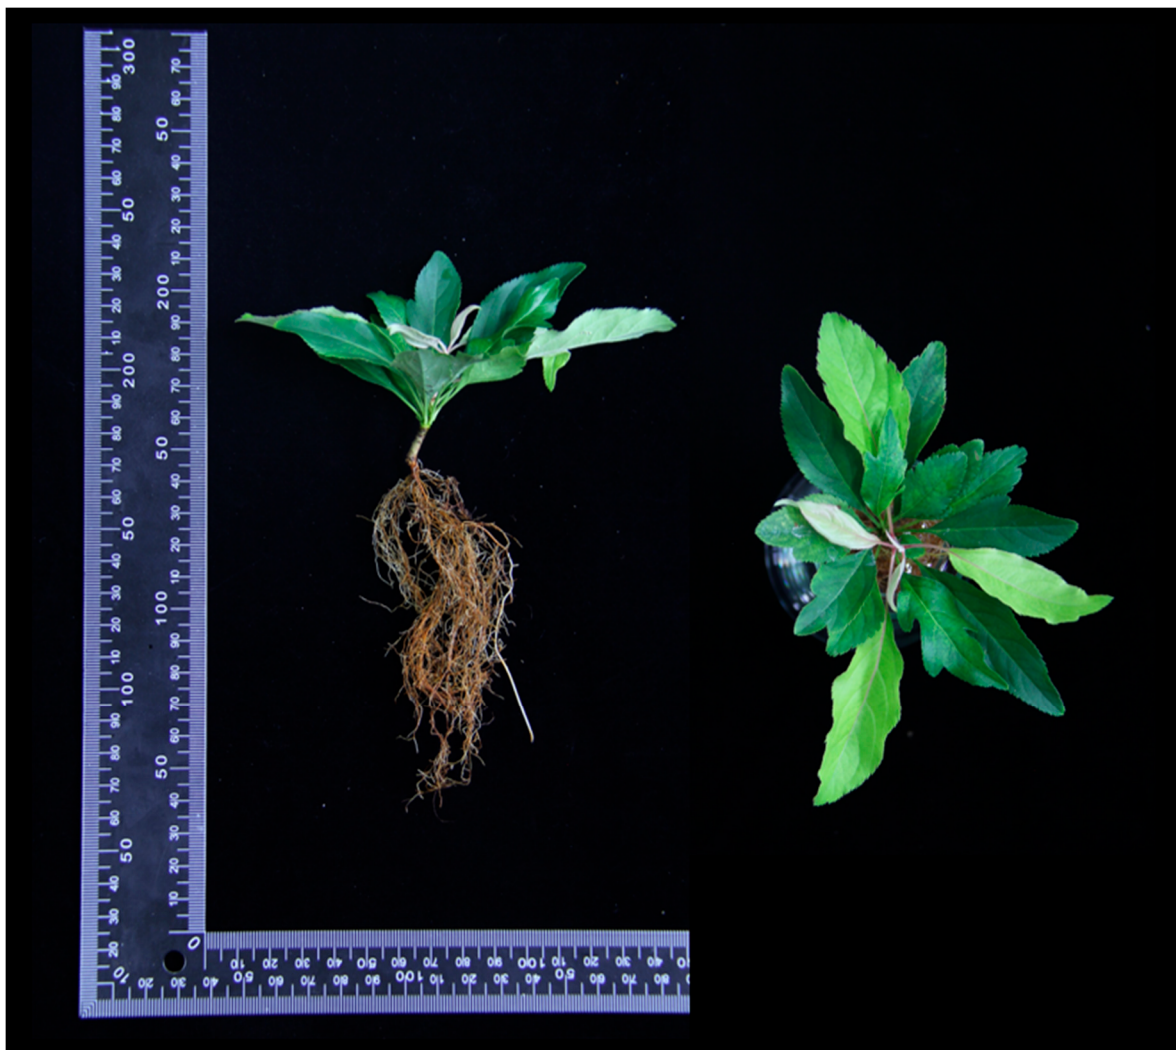

**Figure S5.** The visual picture of a *Pyrus betuleafolia*.
