# Supplementary material
Source: MDPI journal article supplement (https://www.mdpi.com/1999-4907/14/9/1751)
Supplement: s1 [file s1 › Table S1.xlsx]

## Sheet: Table S2
Table S1 Primers used in this paper.
Gene name	Gene ID	Forward primer	Reverse primer
PbeMET1a	GWHTAAYT021621	CAAGGATTCAGGGATAGCTACC	CATAGAAAAACACGACCACGA
PbeMET1b	GWHTAAYT032029	GGGACGAAAACTCAAGGAAG	GCAACGAAACGGATAAACAT
PbeCMT1	GWHTAAYT044647	CGAAAACTCAGCGGAAATGAT	GGTGAGGGGGAGAATCATAACT
PbeCMT3	GWHTAAYT006172	CTGGGCTATGCATTAGGTCTTG	CATATTGTAACGGCAACAGTGAA
PbeDRM2	GWHTAAYT053650	ATCGTGATGGACTGGAGGGTA	ACCGCACTTAGTGGGATAAGAC
PbeDRM3	GWHTAAYT028091	GTATGTCCTTGACGAATGCCG	AAGTGACTTGTACCTGTCAGTCCG
PbeDRM1	GWHTAAYT025788	GGCAAAAGTGTGAACCTAATGG	TTCCCTTCTACTCAAGGACGAG
PbeDnmt2b	GWHTAAYT020534	CAACGACGTTTACGAGCACAA	TGTAAGGTTGGCAAGGAGGAG
PbeNHX2.1	GWHTAAYT040060	ATGAGAGGTGCTGTGTCTATGGC	GGTTCTGACGACAACATGCTG
PbeAKT6	GWHTAAYT031415	CTCTTGCCAGTGAAAATCGTGA	TGATTCACCAGCACTTACAAAAA
PbeAKT2	GWHTAAYT053185	GATTGTGAGATGGAGAGAGAACG	TTGCTTCTACTAGGGCAGTGGT
PbeCBL2	GWHTAAYT006378	TCTCTGTCTTTCATCCCAACGC	TCACATCATCCGAAAGATTCATG
PbeCIPK8	GWHTAAYT051131	AAGAAACAGGAGGAGTTCACGG	ACTTGGACGTGAACACGGAC
PbeCIPK16	GWHTAAYT014962	GGCGATGATGAGGGTGGTAA	CTTCTCAAACTCAACCACGCC
PbeCIPK24	GWHTAAYT039640	CAAGAAGAAGAGCCACGACAAC	TGTTACGAATCCTGGGGTGAG
PbeSOS1	GWHTAAYT024522	GACGATTTACCTAAGGGGCG	AACTGGCTACCCTGGTGCC
PbeCBL4	GWHTAAYT002122	GGACCCTGCGACTCTTGCT	TTCTCCAAACTCAATAACCCCA
PbeCBL10	GWHTAAYT051009	CGCTGATGCTGACAAAGATGG	ACTCGGAAATACTGTCGTGATGT
