# Supplementary material
Source: MDPI journal article supplement (https://www.mdpi.com/1999-4907/14/9/1751)
Supplement: s1 [file s1 › Table S2.xlsx]

## Sheet: Table S1
Table S2 Orthologous and paralogous gene pairs in the pear and apple MTase family.
Gene1	Gene2	Ks	Ka	Ka/Ks	MYA
PbeMET1a	MD15G1231100	0.0473	0.0101	0.213531	3.7527
PbeMET1b	MD02G1115100	0.0537	0.0088	0.163873	4.27646
PbeCMT1	MD06G1022700	0.0411	0.0091	0.221411	2.21922
PbeCMT2	MD03G1011100	0.0587	0.0084	0.143101	2.26242
PbeCMT3	MD11G1012800	0.0695	0.0063	0.0906475	2.26782
PbeDRM1	MD16G1140200	0.042	0.0052	0.12381	3.16955
PbeDRM2	MD09G1029900	0.05	0.0075	0.15	2.69978
PbeDRM3	MD17G1031900	0.0419	0.0022	0.052506	2.89957
PbeDnmt2b	MD15G1120500	0.0792	0.022	0.277778	2.554
PbeMET1a	PbeMET1b	0.1449	0.0336	0.231884	7.82397
PbeCMT2	PbeCMT3	0.1761	0.0442	0.250994	9.50864
PbeDRM2	PbeDRM3	0.1732	0.0432	0.249423	9.35205
MD03G1011100	MD11G1012800	0.2002	0.0399	0.199301	10.8099
MD15G1120500	MD08G1143700	0.1744	0.116	0.665138	9.41685
MD09G1029900	MD17G1031900	0.1716	0.038	0.221445	9.26566
MD13G1146100	MD16G1140200	0.1777	0.0281	0.158132	9.59503
MD02G1115100	MD15G1231100	0.1409	0.0312	0.221434	7.60799
Note, Ka, non-synonymous substitution rate; Ks, synonymous substitution rate; MYA, Million years ago.
