# Supplementary material
Source: MDPI journal article supplement (https://www.mdpi.com/1999-4907/14/9/1751)
Supplement: s1 [file s1 › Table S3.xlsx]

## Sheet: Table S3
Table S3 Analysis of cytosine methylation of a 200bp segment of the promoter region of PbeNHX2.1, PbeCBL2, PbeCBL4 and PbeCIPK24 in P. betulaefolia in response to salt stress.
PbeNHX2.1	Length of target genome sequence	Number of CpGs	Number of bisulfite sequences (used/excluded/total)
	295	18	10/0/10
		Methylation status of each CpG site
	CpG position	1	4	6	21	40	43	62	86	96	121	141	151	159	168	181	198	242	281	total
	Controls Me-CpG	0/10	0/10	0/10	0/10	0/10	0/10	0/10	0/10	0/10	0/10	0/10	0/10	0/10	0/10	0/10	0/10	0/10	0/10	0/180
		0	0	0	0	0	0	0	0	0	0	0	0	0	0	0	0	0	0	0
	NaCl Me-CpG	0/10	1/10	0/10	0/10	0/10	0/10	0/10	0/10	0/10	0/10	0/10	0/10	0/10	0/10	0/10	0/10	0/10	0/10	1/180
		0	0	0	0	0	0	0	0	0	0	0	0	0	0	0	0	0	0	0.006
PbeCBL2	Length of target genome sequence	Number of CpGs	Number of bisulfite sequences (used/excluded/total)
	288	18	10/0/10
		Methylation status of each CpG site
	CpG position	1	4	35	38	41	54	91	94	131	145	159	168	185	197	199	217	219	287	total
	Controls Me-CpG	0/10	0/10	0/10	0/10	0/10	0/10	0/10	0/10	0/10	0/10	0/10	0/10	0/10	0/10	0/10	0/10	0/10	0/10	0/180
		0	0	0	0	0	0	0	0	0	0	0	0	0	0	0	0	0	0	0
	NaCl Me-CpG	0/10	1/10	0/10	0/10	0/10	0/10	0/10	0/10	0/10	1/10	0/10	0/10	0/10	0/10	0/10	0/10	0/10	0/10	1/180
		0	0	0	0	0	0	0	0	0	0	0	0	0	0	0	0	0	0	0.006
PbeCBL4	Length of target genome sequence	Number of CpGs	Number of bisulfite sequences (used/excluded/total)
	220	9	10/0/10
		Methylation status of each CpG site
	CpG position	1	28	72	86	144	157	168	171	208	total
	Controls Me-CpG	0/10	0/10	0/10	0/10	0/10	0/10	0/10	0/10	0/10	0/90
		0	0	0	0	0	0	0	0	0	0
	NaCl Me-CpG	0/10	0/10	0/10	0/10	0/10	0/10	0/10	0/10	0/10	0/90
		0	0	0	0	0	0	0	0	0	0
PbeCIPK24	Length of target genome sequence	Number of CpGs	Number of bisulfite sequences (used/excluded/total)
	234	7	10/0/10
		Methylation status of each CpG site
	CpG position	1	34	75	91	109	121	169	Total
	Controls Me-CpG	0/10	0/10	0/10	0/10	0/10	0/10	0/10	0/70
		0	0	0	0	0	0	0	0
	NaCl Me-CpG	0/10	0/10	0/10	0/10	0/10	0/10	0/10	0/70
		0	0	0	0	0	0	0	0
Ten replicates per DNA sample were analyzed. The percentage of CpG methylation level is highlighted in red boxes.
